# Supplementary material for: Silencing of Thrips palmi UHRF1BP1 and PFAS Using Antisense Oligos Induces Mortality and Reduces Tospovirus Titer in Its Vector
Source: MDPI journal article supplement (doi:10.3390/pathogens11111319), 2022-11-10
Supplement: s1 [file s1]

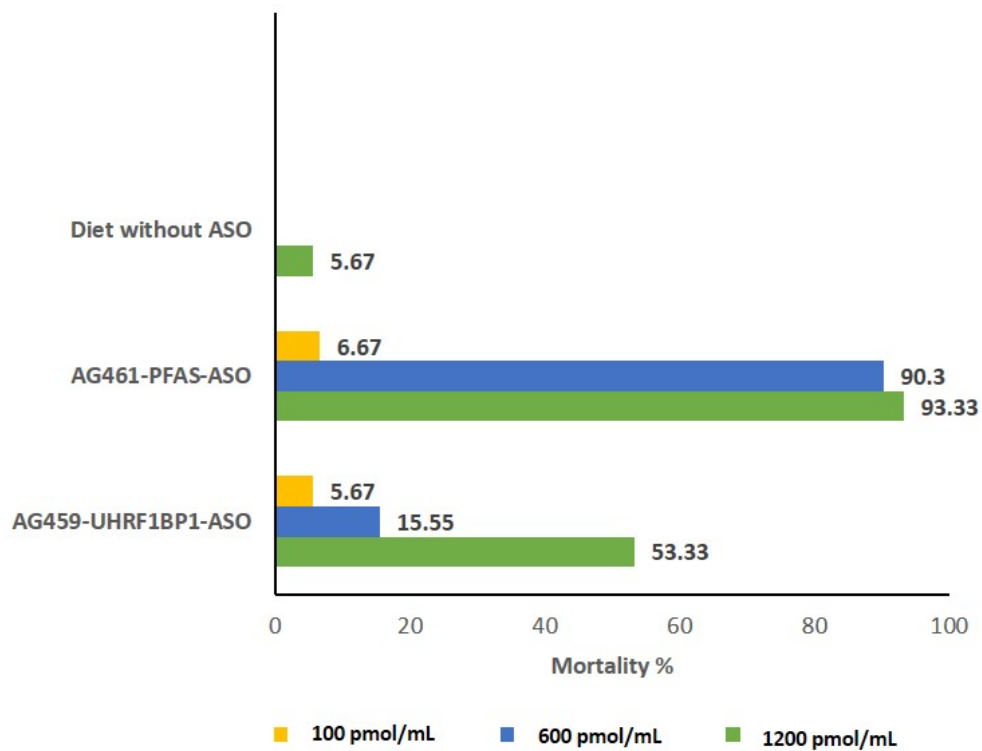

**Supplementary Figure S1.** Response of *Thrips palmi* to different doses of ASO.

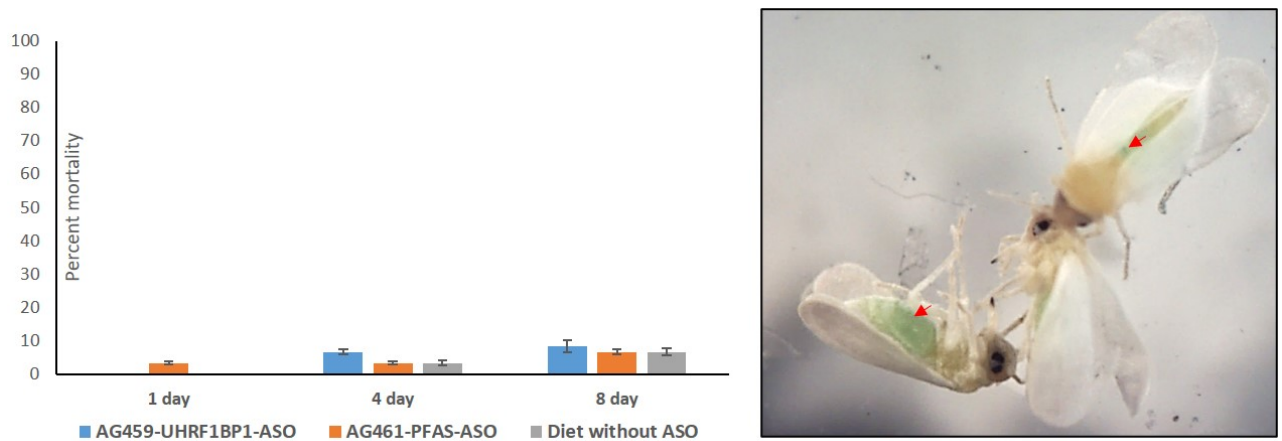

**Supplementary Figure S2.** Effect of ASOs on the fitness of *Bemisia tabaci*. The red arrow indicates a blue tinge in the abdomen due to feeding of ASO mixed diet.
